# Supplementary material for: A Systematic Review of the Sex and Gender Reporting in COVID-19 Clinical Trials
Source: MDPI journal article supplement (doi:10.3390/vaccines9111322), 2021-11-15

**PRISMA 2020 flow diagram for new systematic reviews which included searches of databases, registers and other sources**

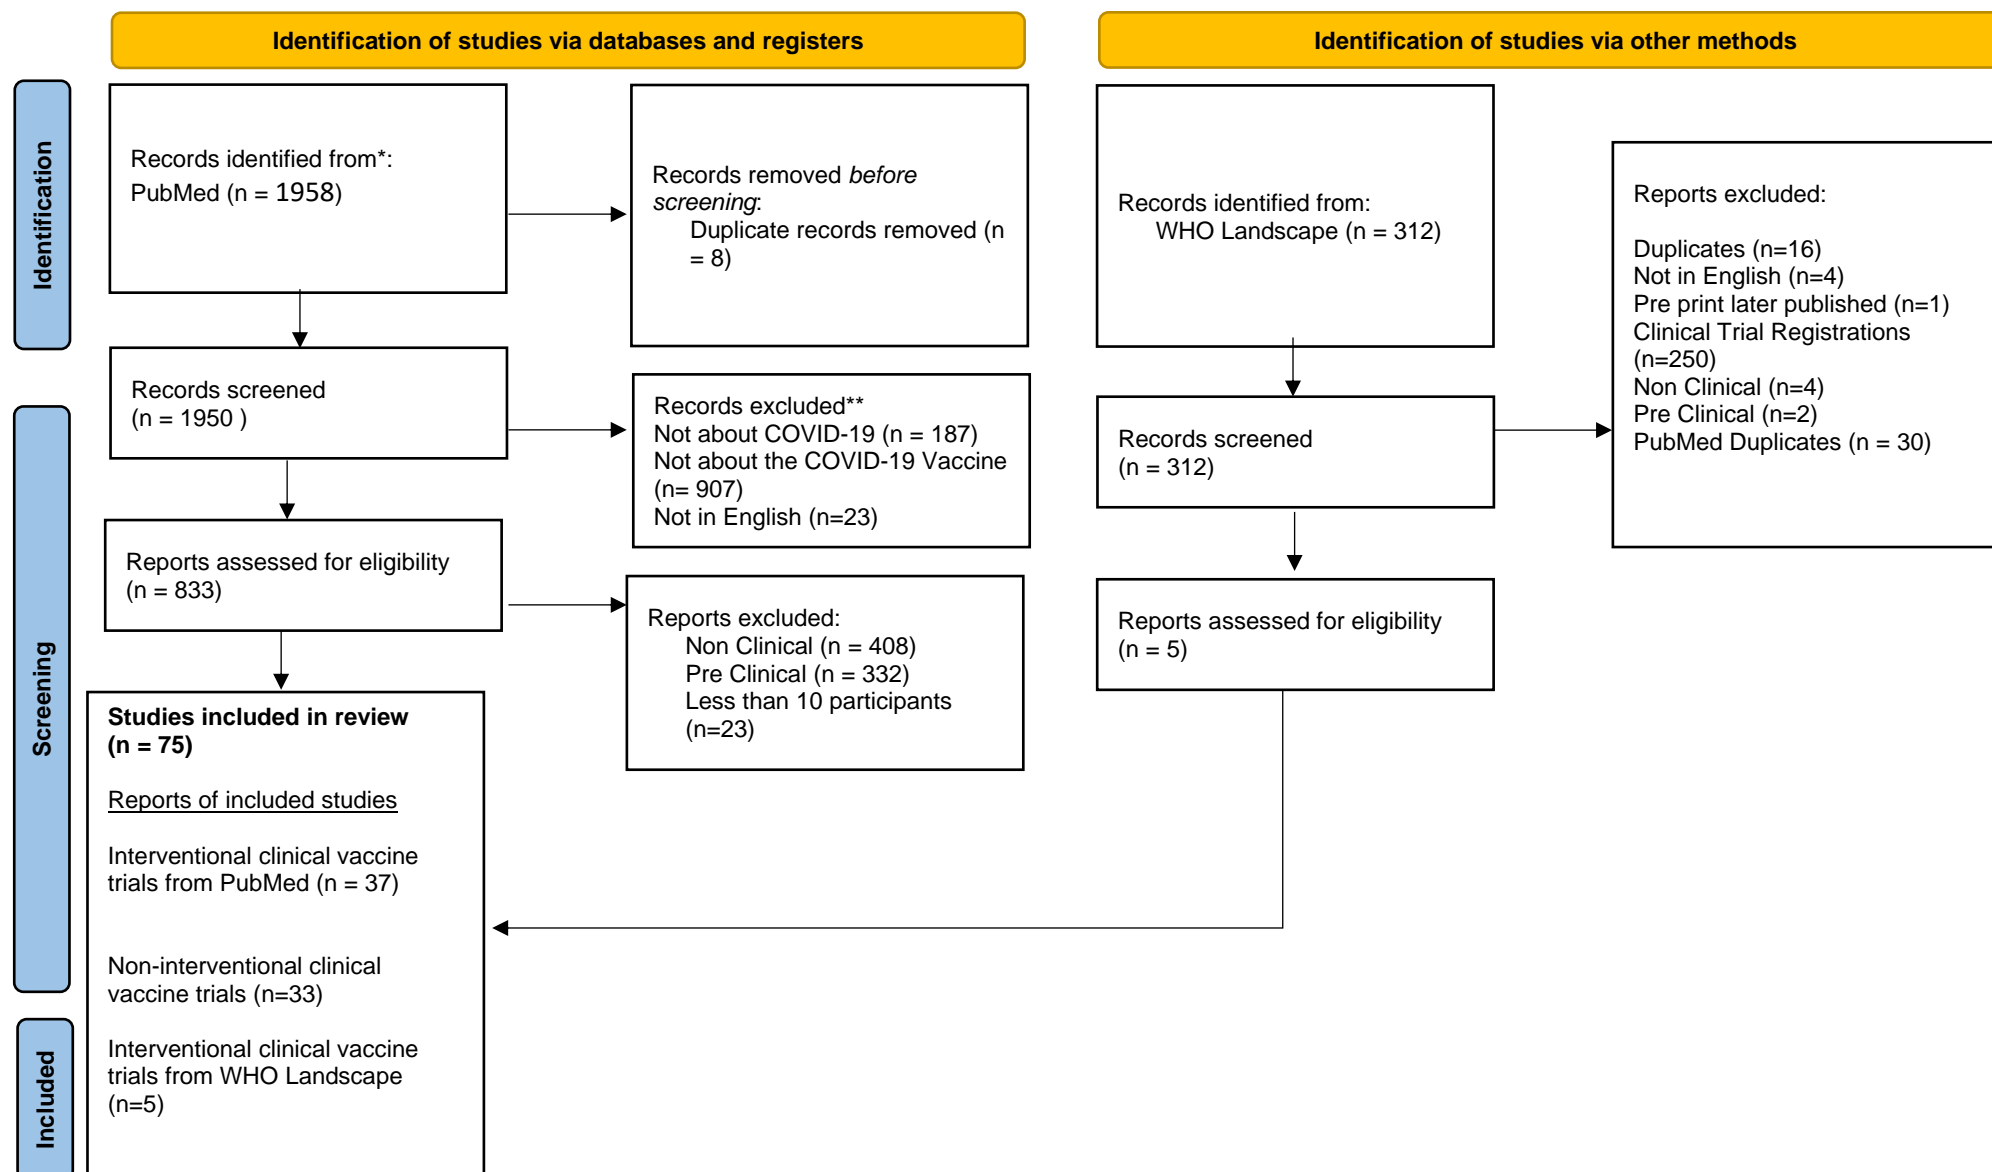

Supplement: s1 [file s1]
